# Supplementary material for: Membrane association and remodeling by intraflagellar transport protein IFT172
Source: PubMed Central journal article supplement (PMC6224603; doi:10.1038/s41467-018-07037-9), 2018-11-08
Supplement: 41467_2018_7037_MOESM4_ESM.pdf [file 41467_2018_7037_MOESM4_ESM.pdf]

- 1 **Title:** Supplementary Movie 1
- 2 **Description:** Confocal microscopy showing the coating of IFT172 (left) on a GUV surface (right). The
- 3 movie was recorded with 20 s each frame. “
