# Supplementary material for: Membrane association and remodeling by intraflagellar transport protein IFT172
Source: Springer Nature journal article supplement (doi:10.1038/s41467-018-07037-9), 2018-11-02
Supplement: MOESM1 [file 41467_2018_7037_MOESM1_ESM.pdf]

# **Membrane association and remodeling by intraflagellar transport protein IFT172**

**Wang et al.**

**Supplementary information**

| Mass     | MS Intensity ( $\times 10^4$ ) | Matched Mass | Delta  | Abbreviation | Formula                                           |
|----------|--------------------------------|--------------|--------|--------------|---------------------------------------------------|
| 786.5990 | 4                              | 786.6008     | 0.0018 | PC, PE       | C <sub>44</sub> H <sub>85</sub> NO <sub>8</sub> P |
| 758.5694 | 4                              | 758.5695     | 0.0001 | PC, PE       | C <sub>42</sub> H <sub>81</sub> NO <sub>8</sub> P |
| 788.6149 | 3                              | 788.6164     | 0.0015 | PC, PE       | C <sub>44</sub> H <sub>87</sub> NO <sub>8</sub> P |
| 760.5825 | 2                              | 760.5851     | 0.0026 | PC, PE       | C <sub>42</sub> H <sub>83</sub> NO <sub>8</sub> P |
| 744.5524 | 2                              | 744.5538     | 0.0014 | PC, PE       | C <sub>41</sub> H <sub>79</sub> NO <sub>8</sub> P |

**Supplementary Table 1** - Mass spectrometry result of purified IFT172 shows co-purification with lipids.

The five most intense peaks are shown with molecular mass (Mass), and the intensity value (MS Intensity) detected by the mass spectrometry measurement. The mass was compared to known lipid masses using an online tool (<http://www.lipidmaps.org/tools/index.html>). “Delta” shows the difference between the input mass and the calculated mass. Abbreviation and Formula show the possible lipid species based on the molecular weight.

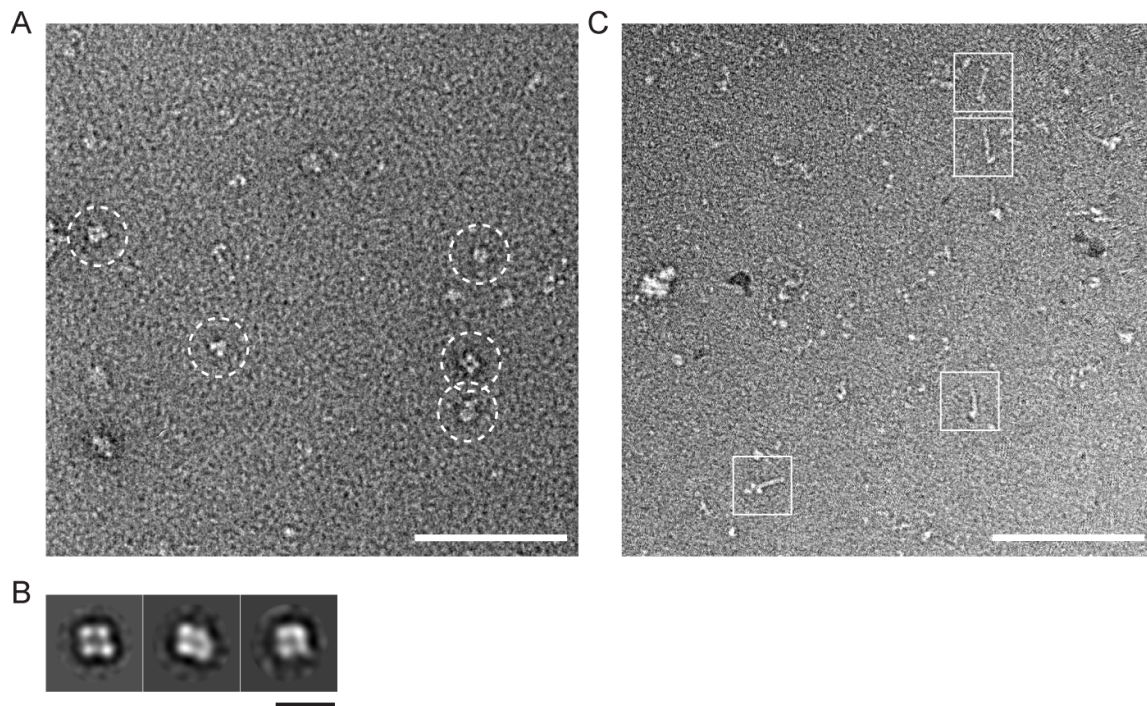

### Supplementary Figure 1

IFT172 monomer purified with additional anion-exchange chromatography.

**A** and **B**. Negative-stain EM image (**A**) and 2D reference free class average of IFT172 monomer (**B**) shows the closed conformation without DDM during purification. Scale bars 100 nm in (**A**), and 20 nm in (**B**). **C** IFT172 employs the open conformation (marked with square) in the presence of DDM. Scale bar: 100 nm.

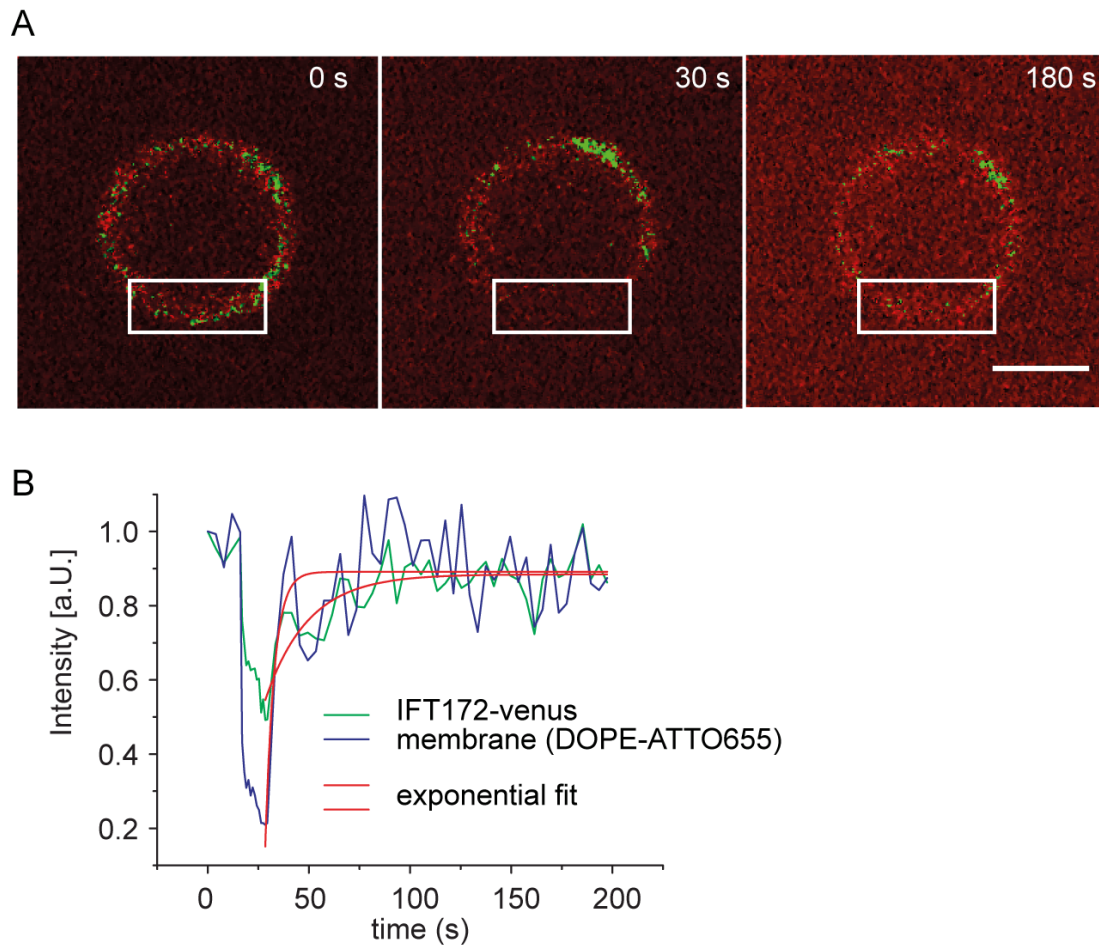

### Supplementary Figure 2

**A.** Confocal image of IFT172-venus bound to the membrane of a GUV before (left) and after (middle) photobleaching the region marked in white. The right image shows the recovery of IFT172 fluorescence in the bleached region. Images were corrected for photobleaching and despeckled. Scale bar: 5  $\mu\text{m}$ . **B.** Corresponding intensity traces of the FRAP experiment showing both mobility of membrane-bound IFT172-venus and the membrane itself (DOPE-ATTO655).

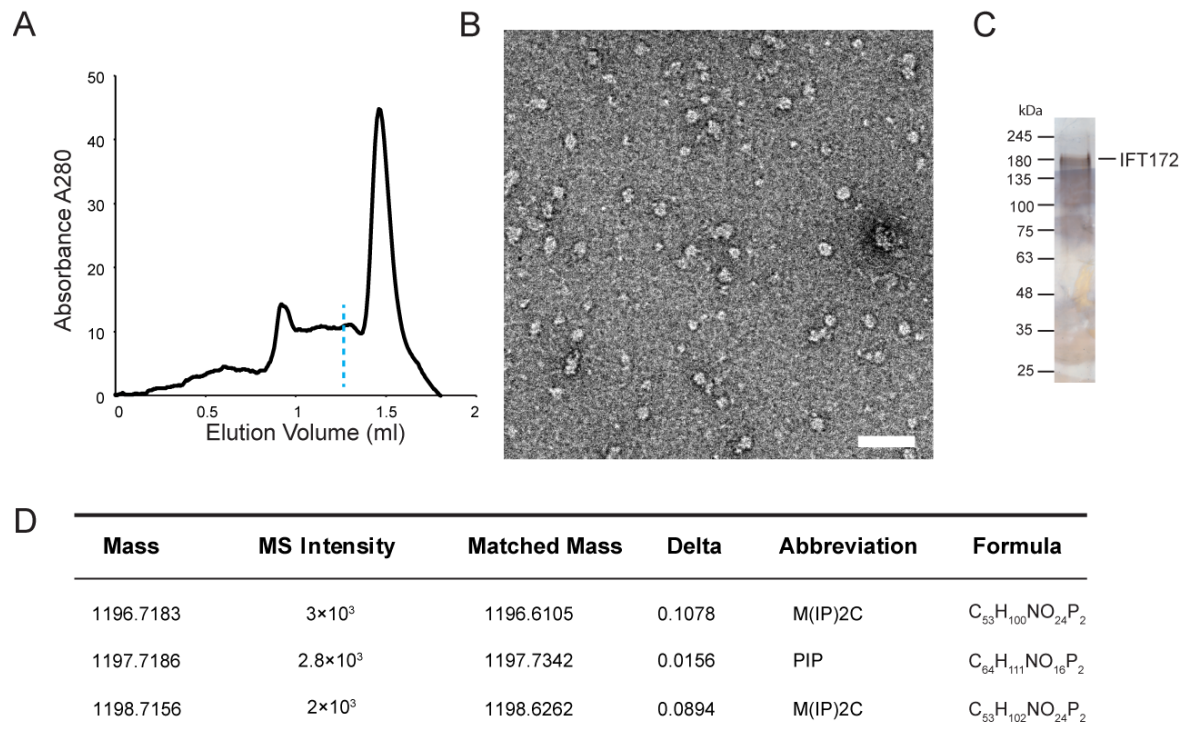

### Supplementary Figure 3

Membrane remodeling products by IFT172 contain both IFT172 and lipids.

**A.** SEC profile of IFT172 with Folch Fraction I mixture. 10  $\mu$ M of IFT172 was mixed with 2 mM Folch Fraction I and incubated for 10 min. Large lipid aggregates were removed by centrifugation before loading on the column. **B.** Negative staining micrograph of the fraction marked in A. Scale bar: 50 nm. **C.** Silver-stained gel of the fraction marked in A shows that IFT172 is present in the fraction. **D.** Mass spectrometric analysis of the fraction confirms the presence of lipids.

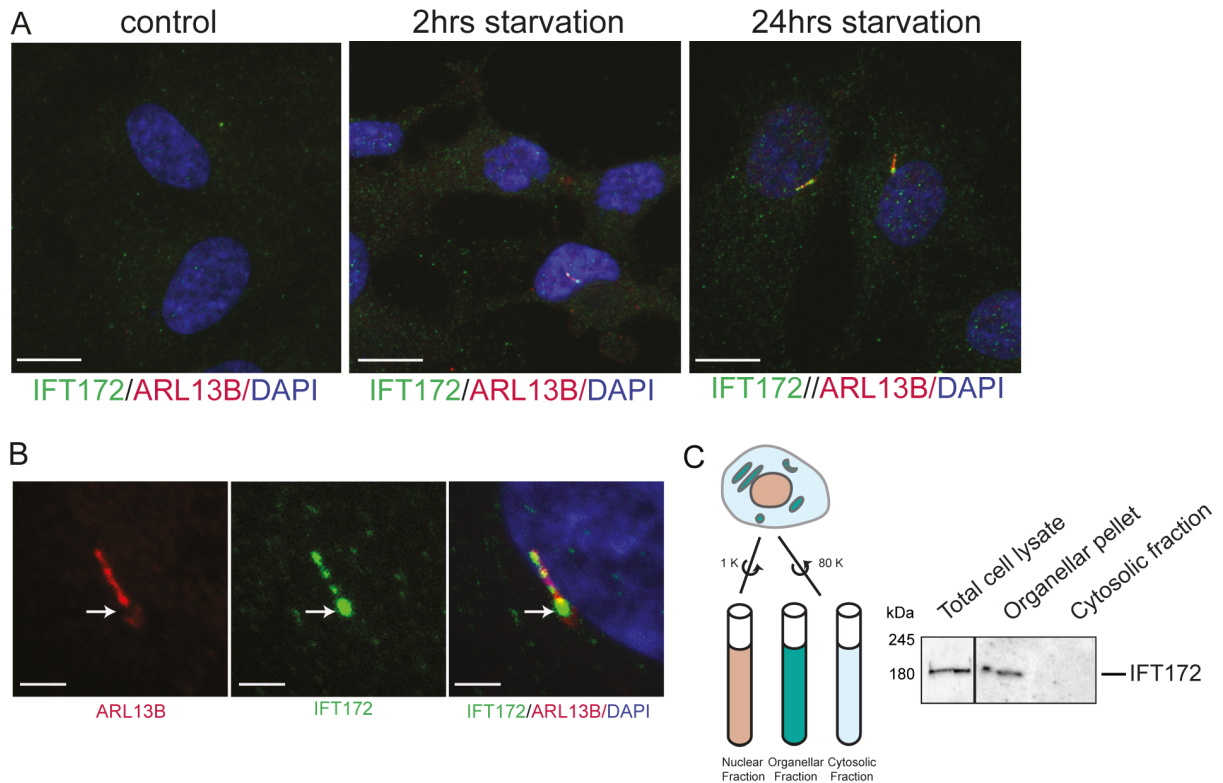

#### Supplementary Figure 4

Subcellular localization of endogenous IFT172.

**A** and **B**. Antibody staining of IFT172 in RPE-1 cells. IFT172 and Arl13b co-localization in the cilia in 24h-starved RPE-1 cells. Scale bar: A- 10  $\mu$ m and B- 2  $\mu$ m. ARL13b is labelled in red, IFT172 in green and DAPI in blue. **C**. Scheme of cell fractionation assay (left) and Western blotting of total cell lysate, organellar pellet, and cytosolic fraction of RPE-1 cell (right). Antibody was used at a dilution of 1:100.

| number | primer name                    | sequence                                                    |
|--------|--------------------------------|-------------------------------------------------------------|
| MT262  | CriFT172 1-fw (+EcoRI)         | GCGCGCGAATTCATGCAACTGCGTTACTTCAAATCAATCCTGC                 |
| MT262  | CriFT172 C-rev (+His; +Xbal)   | GCGCGCTCTAGATTAATGGTGATGGTGATGGTGGTACATAGGTGCCGCCTGCATACCCG |
| MT319  | CriFT172 1-fw (+SmaI)          | GCGCGCCCCGGGATGCAACTGCGTTACTTCAAATCAATCCTGC                 |
| MT320  | CriFT172 C-rev (+His, +SphI)   | GCGCGCGCATGCTTAATGGTGATGGTGATGGTGGTACATAGGTGCCG             |
| MT322  | CriFT172 590-fw (+SmaI)        | GCGCGCCCCGGGATGAATACGGTGTCCTACGCACTGGATGAAG                 |
| MT391  | CriFT172 968-rev (+His, +Xbal) | GCGCGCTCTAGATTAATGGTGATGGTGATGGTGGTAACCGCGCGACACGCTG        |
| MT878  | CriFT172 C-rev (noStop, +Xbal) | GCGCGCTCTAGAGTACATAGGTGCCGCCTGCATACCC                       |
| MM013  | CriFT57 1-fw                   | CCAGGGAGCAGCCTCGATGATGAGCAGCAAGCGGGGTGGGCG                  |
| MM014  | CriFT57 C-rev                  | GCAAAGCACCGCCTCGTTAGTCCTCCTCCTCGTCACTGAGAGCC                |

**Supplementary Table 2** – Primers used for this study.

Supplementary figure 4C

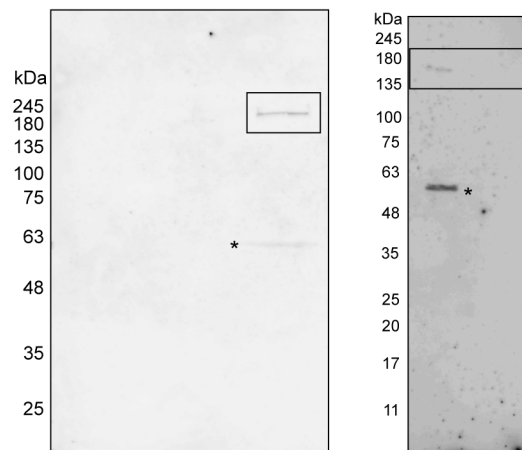

### Supplementary Figure 5

Original uncropped Western blots.

Squared bands are used for display in Supplementary Figure 5. “\*” indicates partially degraded IFT172.
